# Supplementary material
Source: PubMed Central journal article supplement (PMC5849426)
Supplement: NIHMS858058-supplement-2.pdf [file NIHMS858058-supplement-2.pdf]

## Supplemental Information

### *HDAC3 is a master regulator of mTEC development*

*Yael Goldfarb<sup>1,4</sup>, Noam Kadouri<sup>1,4</sup>, Ben Levi<sup>1</sup>, Asaf Sela<sup>1</sup>, Yonatan Herzig<sup>1</sup>, Ronald N Cohen<sup>2</sup>, Anthony Hollenberg<sup>3</sup> & Jakub Abramson<sup>1,5</sup>*

<sup>1</sup>Department of Immunology, Weizmann Institute of Science, Rehovot 76100 Israel

<sup>2</sup>University of Chicago Medical Centre, Chicago, IL 60637, USA

<sup>3</sup>Division of Endocrinology, Beth Israel Deaconess Medical Centre, Boston, MA 02215, USA

<sup>4</sup> Equal contributions

<sup>5</sup> Correspondence should be addressed to JA ([jakub.abramson@weizmann.ac.il](mailto:jakub.abramson@weizmann.ac.il))

# Figure S1. Related to Figure 1

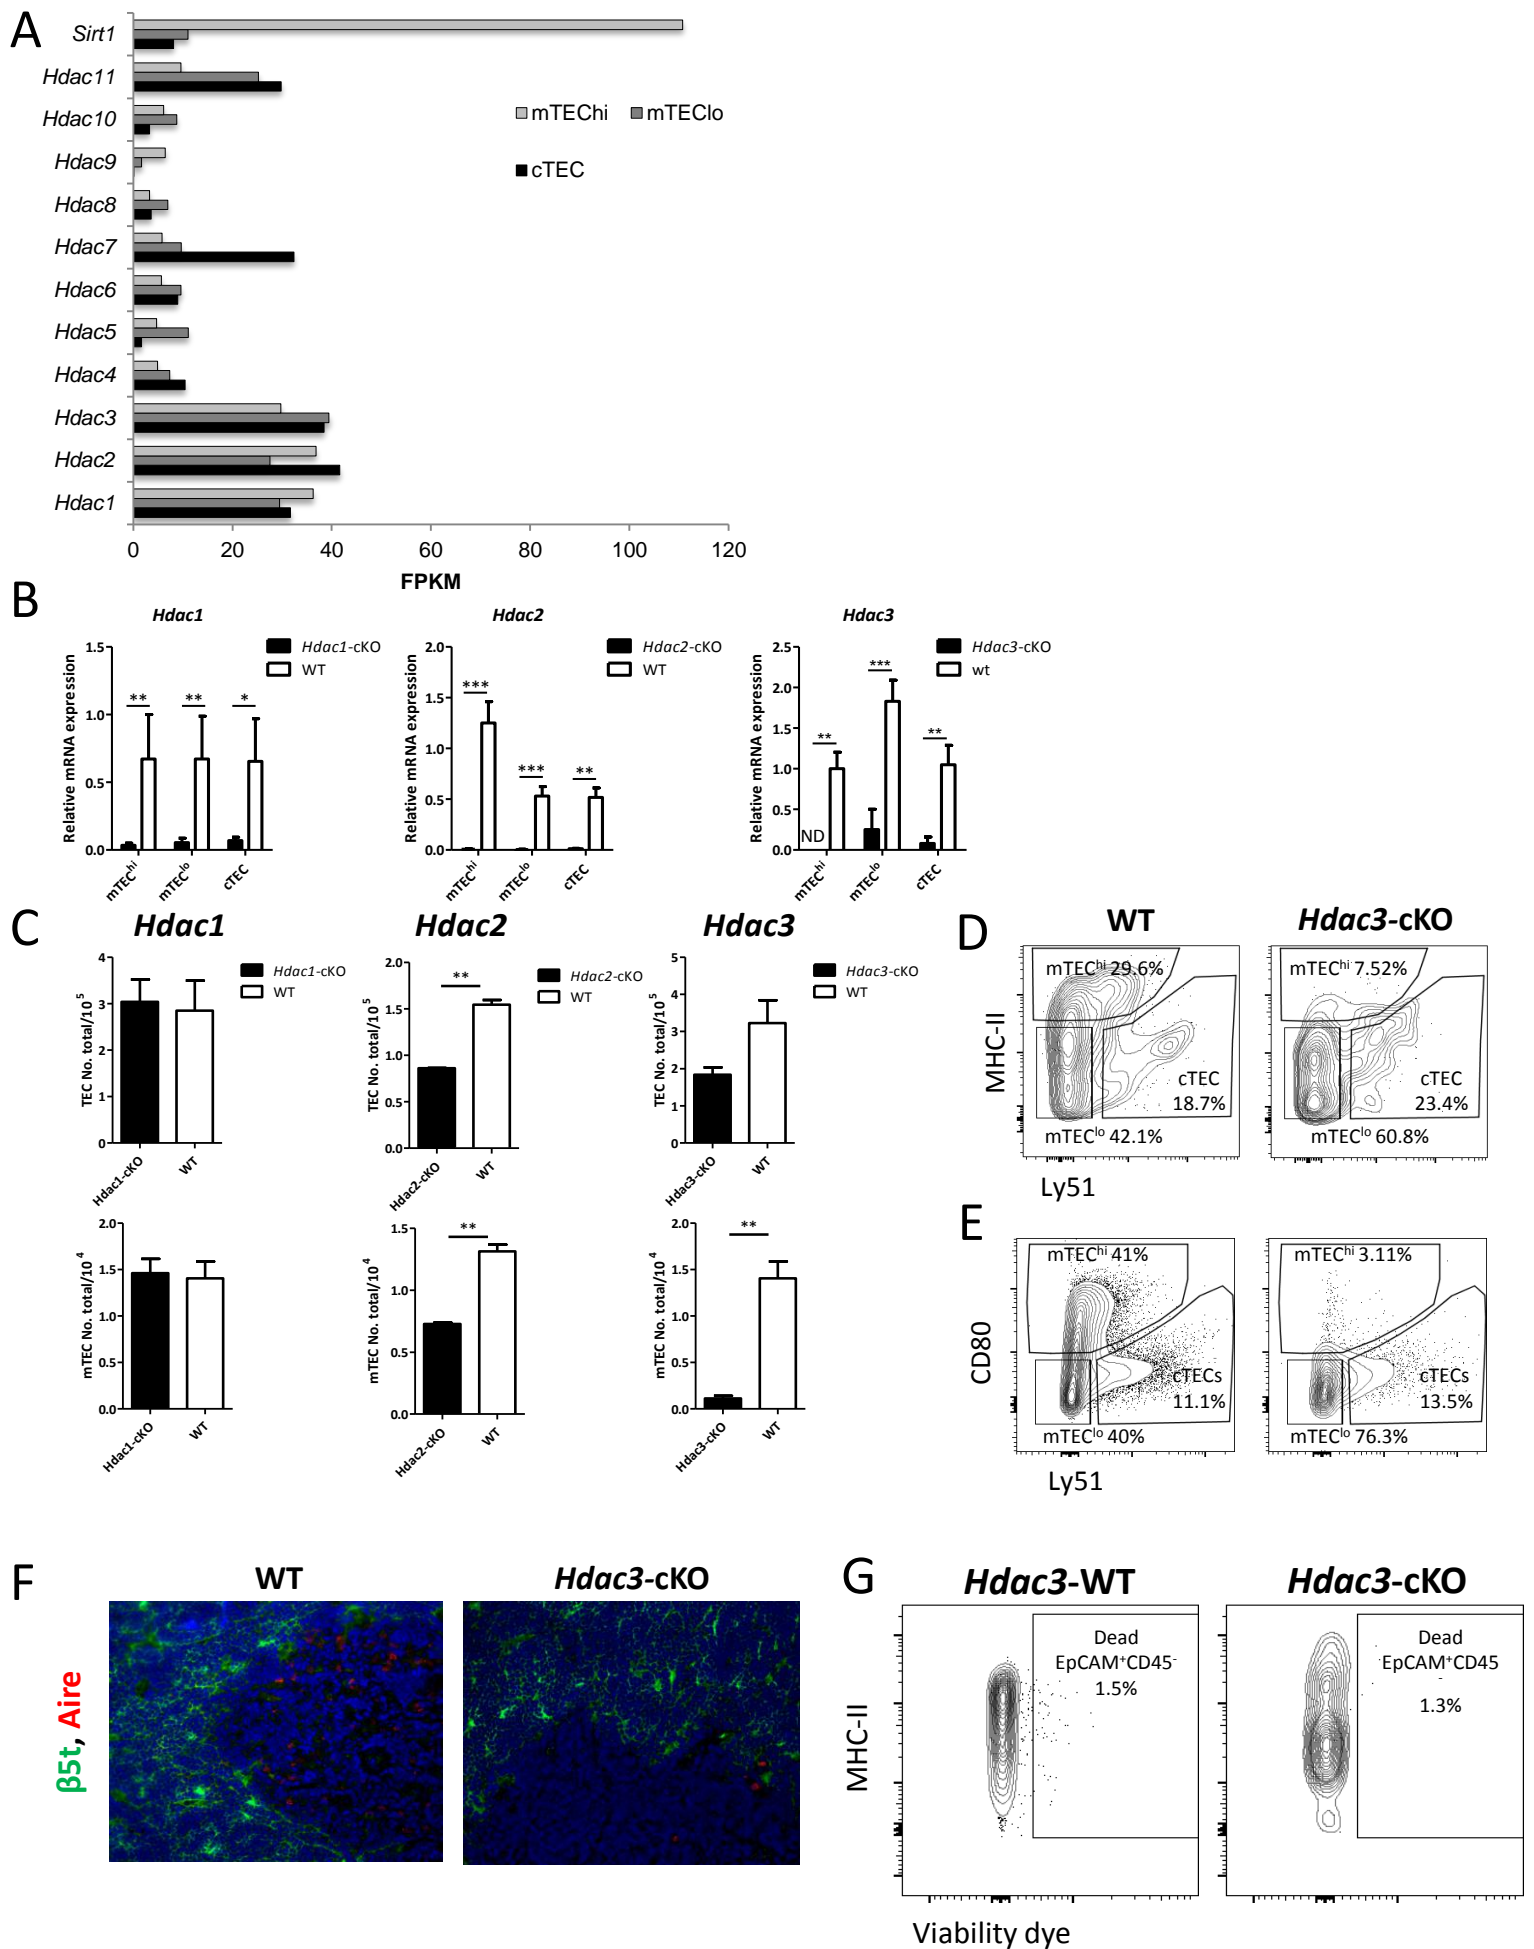

**Suppl. Figure 1, related to Figure 1. (a)** Expression of genes encoding histone and protein deacetylases in mTEC<sup>hi</sup>, mTEC<sup>lo</sup> and cTECs, assessed by RNA sequencing and presented as fragments per kilobase of transcript per million mapped reads (FPKM). **(b)** qPCR analysis of Foxn1.Cre-mediated recombination efficacy of *Hdac1<sup>fl/fl</sup>*, *Hdac2<sup>fl/fl</sup>* and *Hdac3<sup>fl/fl</sup>* loci. The analysis shows relative mRNA expression + SEM of the corresponding *Hdacs* in sorted mTEC<sup>hi</sup>, mTEC<sup>lo</sup> and cTEC populations isolated from either *Foxn1*.Cre-negative (WT; white) or *Foxn1*.Cre-positive (cKO, black) *Hdac1<sup>fl/fl</sup>*, *Hdac2<sup>fl/fl</sup>* and *Hdac3<sup>fl/fl</sup>* mice. Data were normalized to *Hprt* mRNA levels. Asterisks indicate significant differences (\*\*p < 0.001). **(c)** Total cell numbers of the TEC (upper panel) or mTEC (lower panels) compartments of WT *Hdac1<sup>fl/fl</sup>*, *Hdac2<sup>fl/fl</sup>* and *Hdac3<sup>fl/fl</sup>* or their cKO counterparts. **(d)** Representative flow cytometric profile showing frequencies of individual TEC populations from *Hdac3*-cKO and mice and their WT littermates. The displayed cells were first gated on CD45<sup>-</sup>EpCAM<sup>+</sup> cells (Fig. 1B) and then according to MHC-II or **(e)** CD80 and Ly51 expression to highlight medullary (mTEC) and cortical (cTEC) populations. Individual gates indicate cortical (cTECs) and medullary (mTECs) epithelial cells either high (mTEC<sup>hi</sup>) or dim (mTEC<sup>lo</sup>) for MHC-II and CD80 molecule expression. **(f)** Representative staining of frozen thymic sections (20× magnification) from WT and *Hdac3*-cKO mice. β5t staining (green) highlights cortical regions, DAPI staining (blue) highlights cell nuclei and is typically more intense in the cortex, Aire staining (red). **(g)** Representative staining of the thymic stroma (CD45<sup>-</sup>EpCAM<sup>+</sup> cells) isolated from *Hdac3*-cKO and WT littermates with viability dye and MHC-II.

## Figure S2. Related to Figure 2

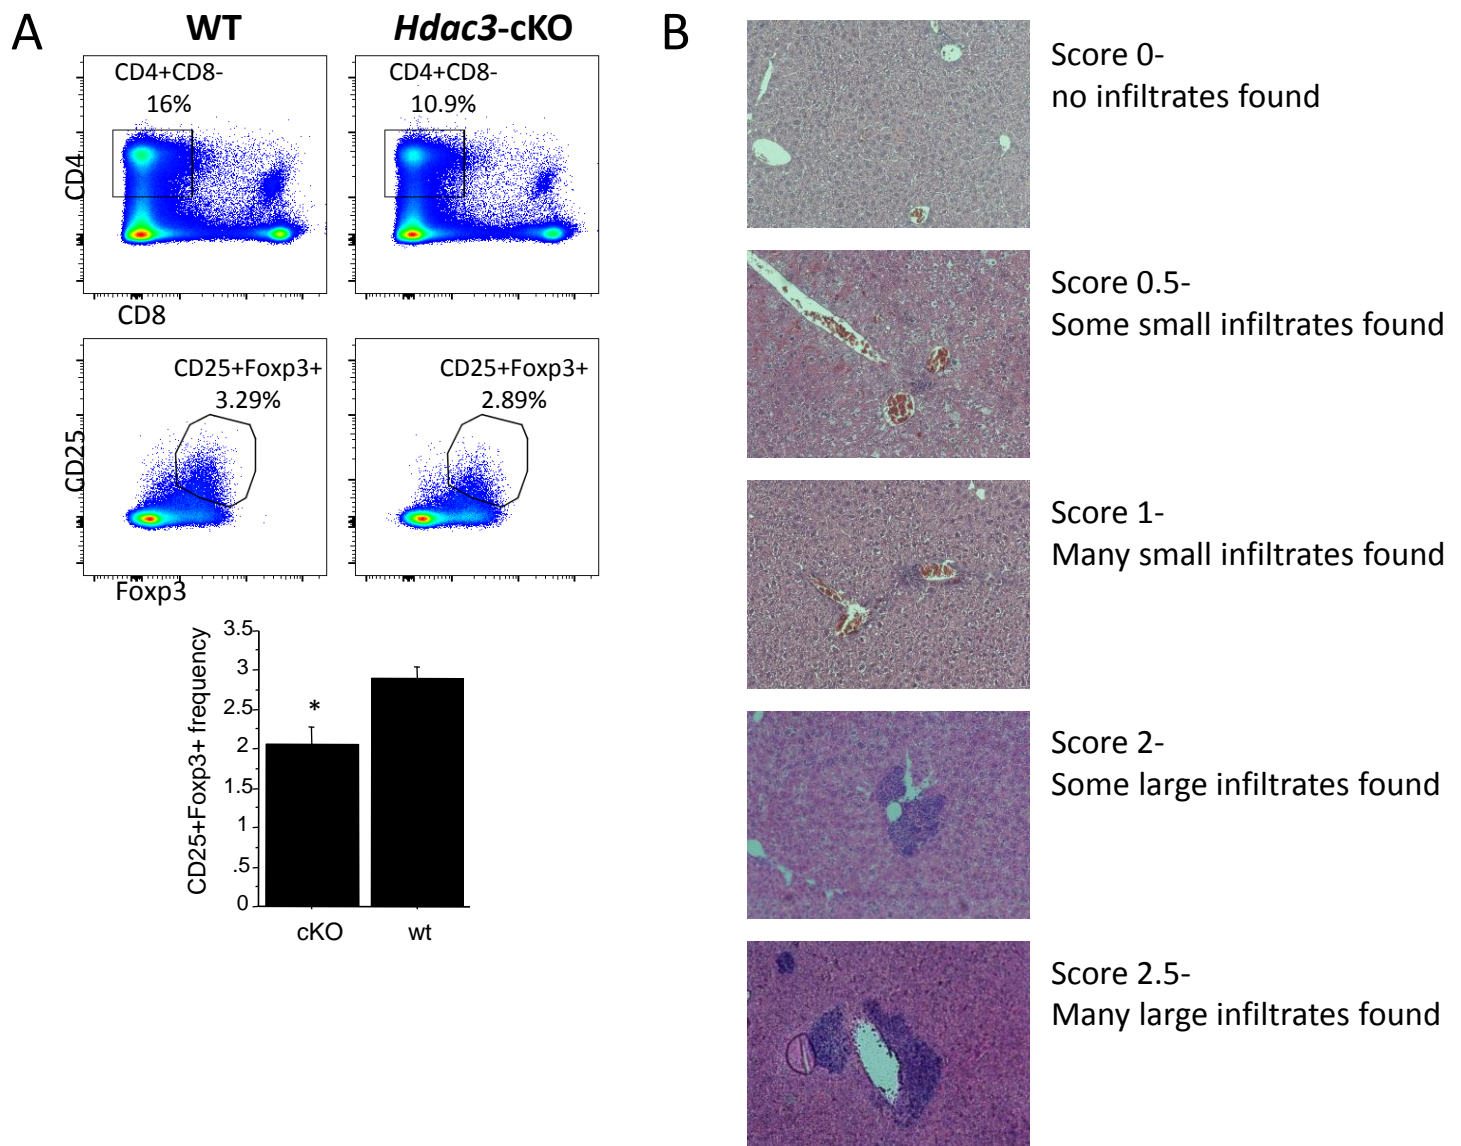

**Suppl. Figure 2, related to Figure 2.** (a) Representative flow cytometric profile showing frequencies of CD4/CD8 splenocytes (upper panel) and CD4<sup>+</sup>CD25<sup>+</sup>Foxp3<sup>+</sup> T<sub>reg</sub> cells (lower panel) obtained from 5-week-old WT and *Hdac3*-cKO spleens, as well as respective graphs showing average frequencies + SEM of CD4<sup>+</sup>CD25<sup>+</sup>Foxp3<sup>+</sup> T<sub>reg</sub> cells isolated from WT (white) and *Hdac3*-cKO mice (black); Average values are calculated from three WT and three *Hdac3*-cKO animals, asterisks indicate significant differences (\**p* < 0.05). (b) Hematoxylin and eosin (H&E) staining of paraffin embedded sections of livers from aged WT or *Hdac3*-cKO mice representing the scoring system used for assessing immune cell infiltration.

**Figure S3. Related to Figure 3**

**A**

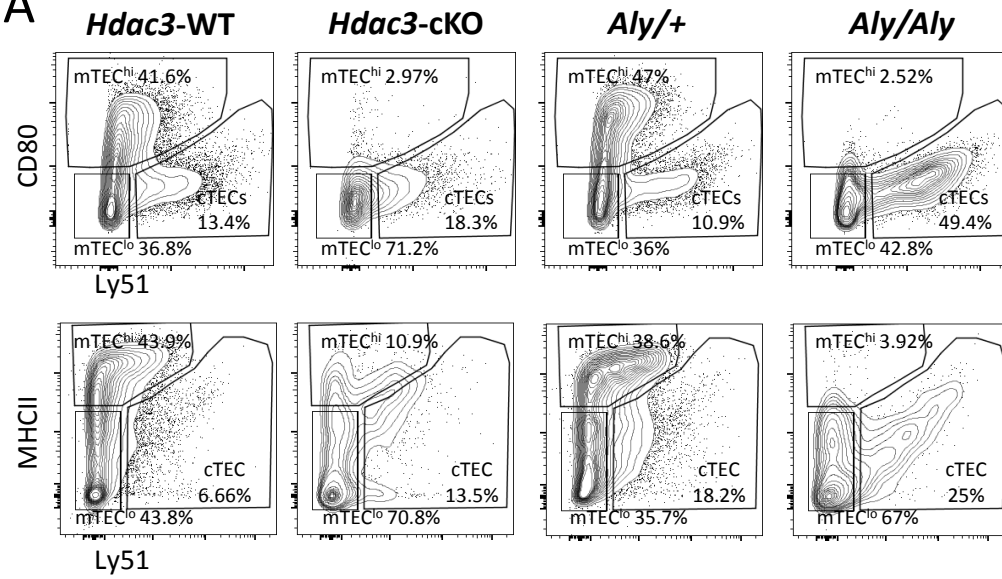

**B**

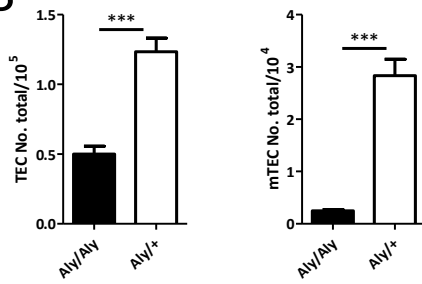

**C**

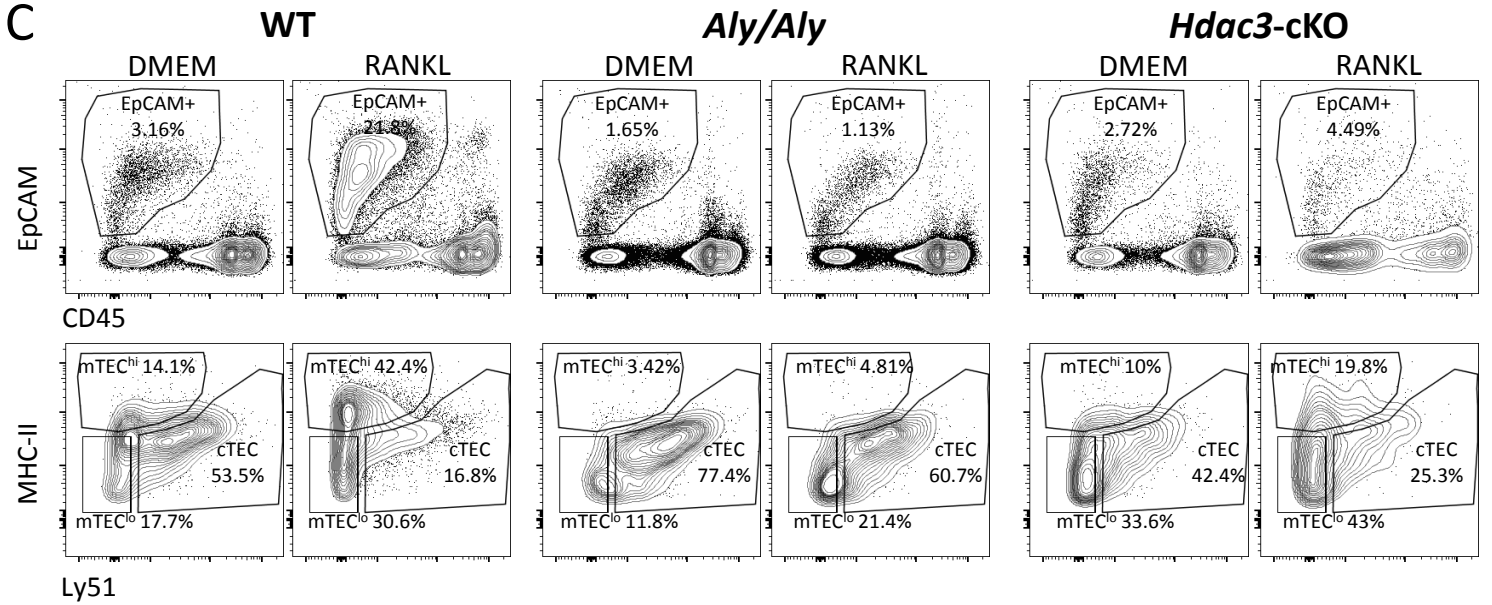

**Suppl. Figure 3, related to Figure 3. (a)** Representative flow cytometric profile showing frequencies of individual TEC populations from the mice indicated in Fig 3C. The displayed cells were first gated on CD45<sup>-</sup>EpCAM<sup>+</sup> cells (Fig. 3C) and then analyzed according to CD80 and Ly51 expression to depict medullary (mTEC) and cortical (cTEC) populations. Individual gates indicate cortical (cTECs) and medullary (mTECs) epithelial cells either high (mTEC<sup>hi</sup>) or dim (mTEC<sup>lo</sup>) for CD80 (upper panel) and MHC-II (lower panel) molecule expression **(b)** Total cell numbers of the TEC and mTEC compartments of *Aly*<sup>+/-</sup> and *Aly/Aly* mice. **(c)** Representative flow cytometric profiles of Fetal Thymic Organ Cultures (FTOCs) prepared from thymi isolated from E16.5-old WT, *Hdac3*-cKO and *Aly/Aly* embryos. The FTOCs were cultured for 7 days either in the absence (DMEM) or presence of soluble recombinant RANKL (1250ng/ml). Cells were first gated on CD45<sup>-</sup>EpCAM<sup>+</sup> cells (upper panel) and were then gated according to Ly51 and MHC-II expression (lower panels). Individual gates indicate cortical (cTECs) and medullary (mTECs) epithelial cells either high (mTEC<sup>hi</sup>) or dim (mTEC<sup>lo</sup>) for MHC-II molecule expression.

**Figure S4. Related to Figure 4**

**A**

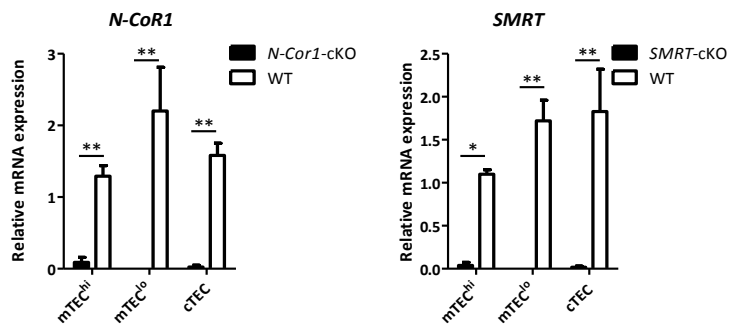

**B**

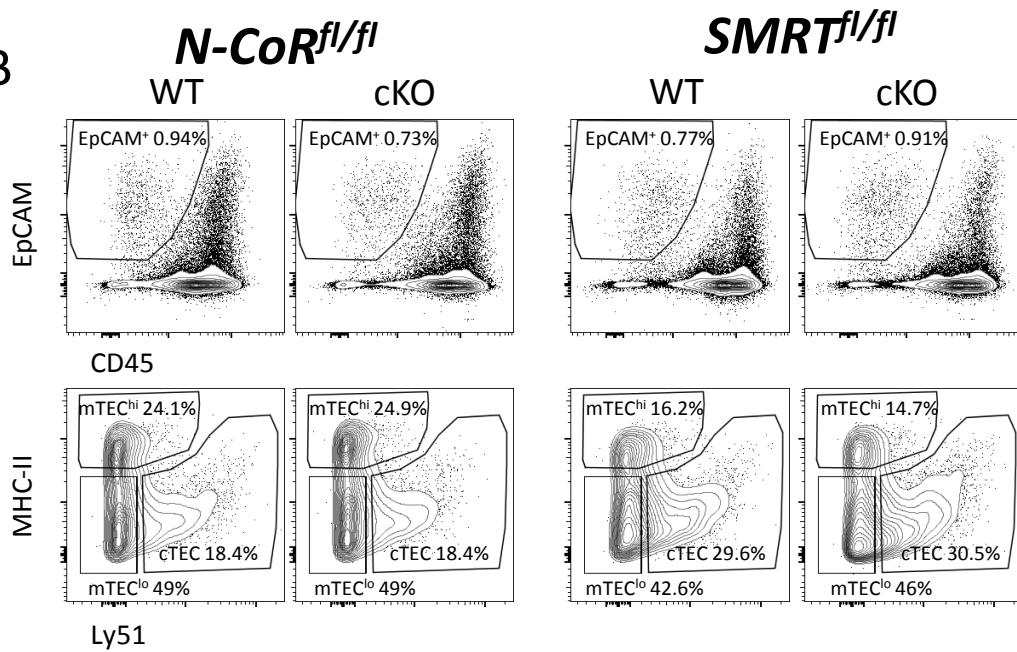

**Suppl. Figure 4, related to Figure 4.** (a) qPCR analysis of *Foxn1*.Cre-mediated recombination efficacy of *N-CoR1<sup>fl/fl</sup>* and *SMRT<sup>fl/fl</sup>* loci. Shown is relative mRNA expression + SEM of WT *N-CoR1* and *SMRT* in sorted mTEC<sup>hi</sup>, mTEC<sup>lo</sup> and cTEC populations isolated from either *Foxn1*.Cre-negative (WT; white) or *Foxn1*.Cre-positive (cKO, black) *N-CoR1<sup>fl/fl</sup>* or *SMRT<sup>fl/fl</sup>* mice. Data were normalized to *Hprt* mRNA levels. Asterisks indicate significant differences (\*p < 0.05, \*\*p < 0.001). (b) Representative flow cytometric profiles of WT and *N-CoR1* or *SMRT* individual cKO. Cells were first gated on CD45-EpCAM<sup>+</sup> cells (upper panel) and were then gated according to Ly51 and MHC-II expression (lower panels). Individual gates indicate cortical (cTECs) and medullary (mTECs) epithelial cells either high (mTEC<sup>hi</sup>) or dim (mTEC<sup>lo</sup>) for MHC-II molecule expression.



**Figure S5. Related to Figure 5**

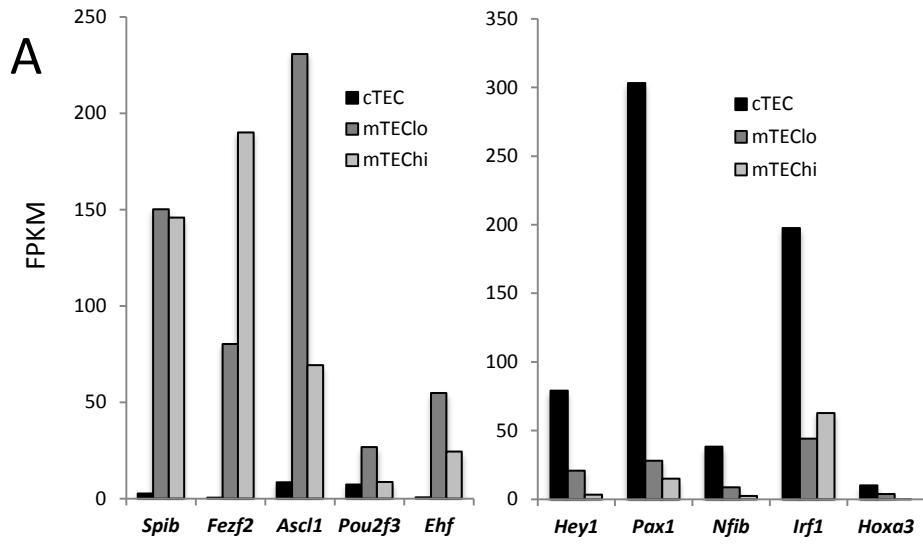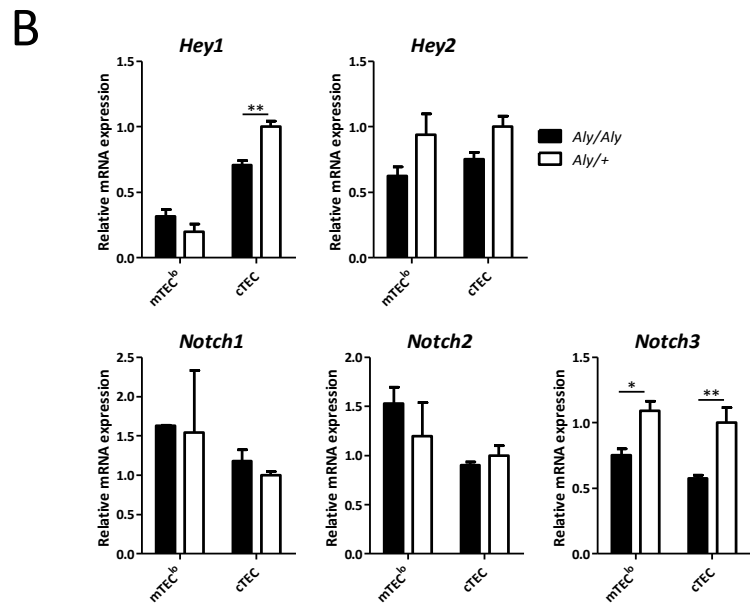

**Suppl. Figure 5, related to Figure 5.** (a) Expression of genes encoding mTEC specific (left panel) or cTEC specific (right panel) *Hdac3*-dependent TFs in mTEC<sup>hi</sup>, mTEC<sup>lo</sup> and cTECs, assessed by RNA sequencing and presented as fragments per kilobase of transcript per million mapped reads (FPKM). (b) Quantitative Real-Time PCR analysis assessing expression of a number of Notch pathway related genes in sorted mTEC<sup>lo</sup> and cTEC cells isolated from *Aly*/<sup>+</sup> (white) or *Aly*/*Aly* mice (black); data were normalized to *Hprt* mRNA levels and presented as percent of expression in WT cTEC; Asterisks indicate significant differences (\*p < 0.05 and \*\*p < 0.001).

**Figure S6. Related to Figure 6**

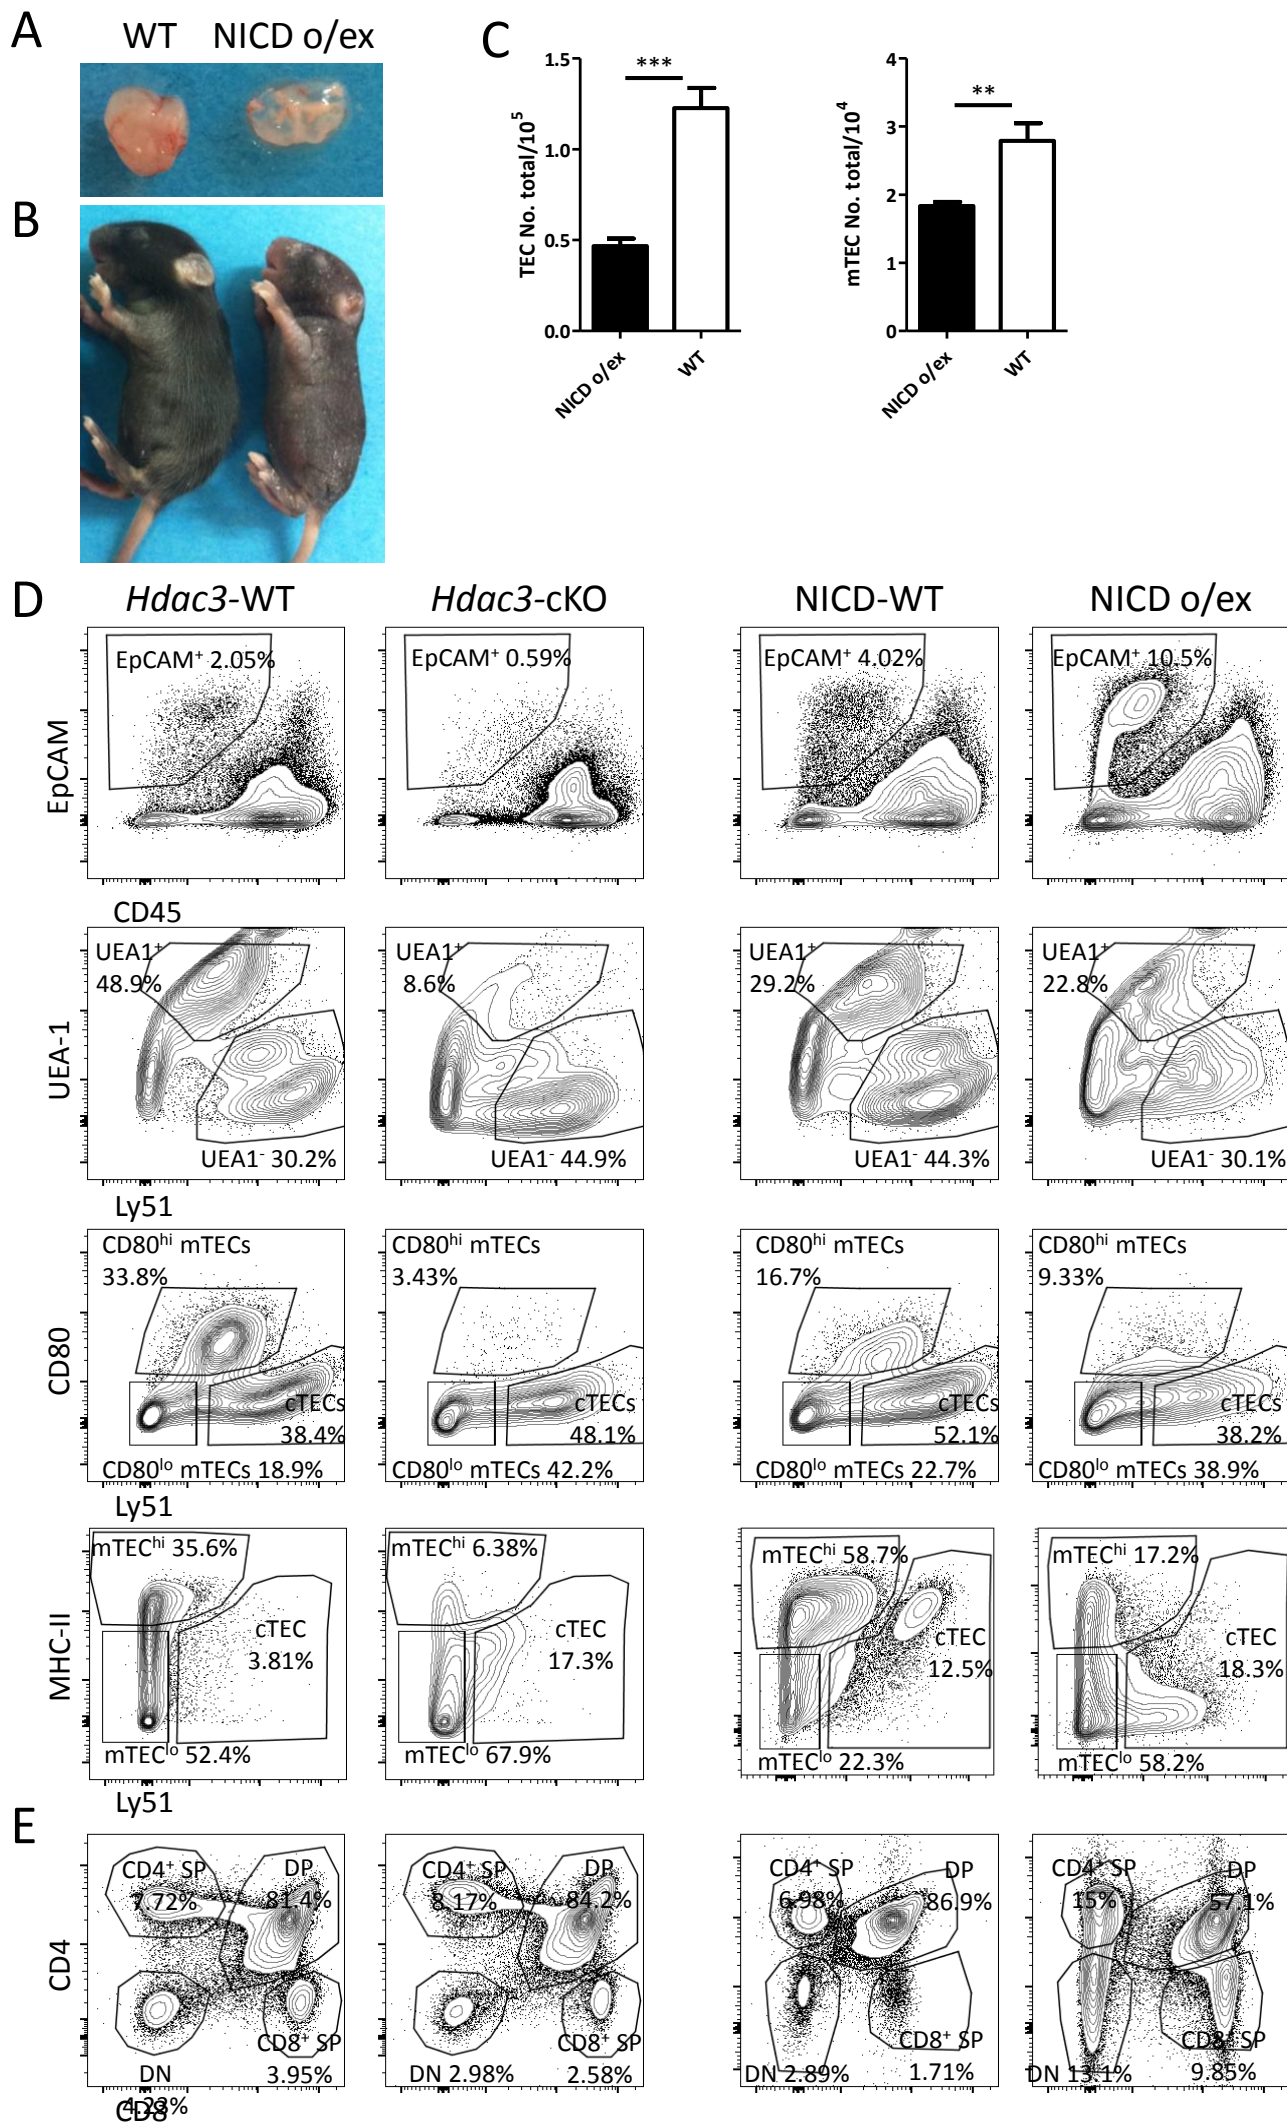

**Suppl. Figure 6, related to Figure 6.** (a) Thymi isolated from 10d old Rosa.flox-STOP-flox-NICD<sup>Foxn1.Cre-</sup> (WT) and Rosa.flox-STOP-flox-NICD<sup>Foxn1.Cre+</sup> (NICD o/ex) (b) Picture of 10d old Rosa.flox-STOP-flox-NICD<sup>Foxn1.Cre-</sup> (WT) and Rosa.flox-STOP-flox-NICD<sup>Foxn1.Cre+</sup> (NICD o/ex) mice showing skin phenotype caused by *Foxn1*-dependent Notch1 over-activation in keratinocytes and hair follicles. (c) Total cell numbers of the TEC and mTEC compartments of WT and NICD o/ex mice. (d) Representative flow cytometric profiles of dispersed thymic epithelial cell populations from 6-week-old *Hdac3*-WT, *Hdac3*-cKO, NICD-WT and NICD o/ex mice. Cells were first gated on CD45<sup>+</sup>EpCAM<sup>+</sup> cells (upper panels) and were then either gated according to Ly51 and UEA-1 expression (middle panels), or according to CD80 or MHC-II and Ly51 expression (lower panels). Individual gates indicate cortical (cTECs, Ly51<sup>+</sup>UEA-1<sup>-</sup>) and medullary (mTECs, Ly51<sup>neg/lo</sup>UEA-1<sup>+</sup>) epithelial cells either high (mTEC<sup>hi</sup>) or dim (mTEC<sup>lo</sup>) for CD80 and MHC-II molecule expression. (e) Representative flow cytometric profiles of CD4/CD8 thymocyte populations from 6-week-old *Hdac3*-WT, *Hdac3*-cKO, NICD-WT and NICD o/ex mice.

Suppl. Table 1

| Top50 transcription factors induced by HDAC3 in mTECs |                 |                |        |          |             |  |
|-------------------------------------------------------|-----------------|----------------|--------|----------|-------------|--|
| Probe Set ID                                          | Gene Symbol     | mRNA Accession | WT     | HDAC3cKO | WT/KO ratio |  |
| 10592705                                              | <b>Pou2f3</b>   | NM_011139      | 4162.5 | 332.2    | 12.5        |  |
| 10371578                                              | <b>Ascl1</b>    | NM_008553      | 7783.4 | 639.7    | 12.2        |  |
| 10543362                                              | <i>Fezf1</i>    | NM_028462      | 1084.6 | 101.3    | 10.7        |  |
| 10417620                                              | <b>Fezf2</b>    | NM_080433      | 2938.3 | 358.8    | 8.2         |  |
| 10485445                                              | <b>Ehf</b>      | NM_007914      | 2305.3 | 303.3    | 7.6         |  |
| 10462575                                              | <i>Lipm</i>     | NM_023903      | 705.5  | 93.8     | 7.5         |  |
| 10344679                                              | <i>St18</i>     | NM_173868      | 805.4  | 114.0    | 7.1         |  |
| 10346168                                              | <i>Stat4</i>    | NM_011487      | 1119.2 | 174.2    | 6.4         |  |
| 10354777                                              | <i>Satb2</i>    | NM_139146      | 975.5  | 155.4    | 6.3         |  |
| 10540401                                              | <i>Lrrn1</i>    | NM_008516      | 929.5  | 151.3    | 6.1         |  |
| 10416251                                              | <i>Egr3</i>     | NM_018781      | 3066.0 | 523.0    | 5.9         |  |
| 10558580                                              | <i>Utf1</i>     | NM_009482      | 867.2  | 153.8    | 5.6         |  |
| 10400504                                              | <i>Foxa1</i>    | NM_008259      | 931.6  | 207.3    | 4.5         |  |
| 10494672                                              | <i>Tbx15</i>    | NM_009323      | 220.7  | 49.4     | 4.5         |  |
| 10432032                                              | <i>Vdr</i>      | NM_009504      | 1706.1 | 407.1    | 4.2         |  |
| 10356593                                              | <i>Hes6</i>     | NM_019479      | 2549.2 | 612.4    | 4.2         |  |
| 10349993                                              | <i>Myog</i>     | NM_031189      | 427.3  | 105.4    | 4.1         |  |
| 10361023                                              | <i>Prox1</i>    | NM_008937      | 473.4  | 118.0    | 4.0         |  |
| 10571601                                              | <i>Pdlim3</i>   | NM_016798      | 3352.7 | 961.4    | 3.5         |  |
| 10549276                                              | <i>Bhlhe41</i>  | NM_024469      | 1069.6 | 310.2    | 3.4         |  |
| 10490755                                              | <i>Hnf4g</i>    | NM_013920      | 240.9  | 72.3     | 3.3         |  |
| 10358027                                              | <i>Elf3</i>     | NM_001163131   | 3618.6 | 1093.1   | 3.3         |  |
| 10350594                                              | <i>Ivns1abp</i> | NM_054102      | 7126.5 | 2200.4   | 3.2         |  |
| 10575763                                              | <i>Gan</i>      | NM_001081151   | 1027.6 | 323.1    | 3.2         |  |
| 10603116                                              | <i>Asb11</i>    | NM_026853      | 264.2  | 84.2     | 3.1         |  |
| 10510422                                              | <i>Casz1</i>    | NM_001159344   | 720.8  | 234.5    | 3.1         |  |
| 10562812                                              | <b>Spib</b>     | NM_019866      | 4599.3 | 1586.1   | 2.9         |  |
| 10515590                                              | <i>Kdm4a</i>    | NM_001161823   | 3296.2 | 1158.7   | 2.8         |  |
| 10352576                                              | <i>Esrrg</i>    | NM_011935      | 377.7  | 133.2    | 2.8         |  |
| 10404389                                              | <i>Irf4</i>     | NM_013674      | 472.4  | 167.2    | 2.8         |  |
| 10489961                                              | <i>Nfatc2</i>   | NM_010899      | 736.5  | 263.5    | 2.8         |  |
| 10569385                                              | <i>Ascl2</i>    | NM_008554      | 181.5  | 66.0     | 2.8         |  |
| 10419966                                              | <i>Zfhx2</i>    | NM_001039198   | 642.2  | 241.8    | 2.7         |  |
| 10473809                                              | <i>Sfpi1</i>    | NM_011355      | 1018.2 | 392.6    | 2.6         |  |
| 10569102                                              | <i>Irf7</i>     | NM_016850      | 3286.9 | 1270.4   | 2.6         |  |
| 10381172                                              | <i>Stat5a</i>   | NM_011488      | 1428.8 | 552.7    | 2.6         |  |
| 10514347                                              | <i>Cdkn2b</i>   | NM_007670      | 803.8  | 325.4    | 2.5         |  |
| 10451763                                              | <i>Satb1</i>    | NM_009122      | 1555.0 | 643.7    | 2.4         |  |
| 10422013                                              | <i>Klf12</i>    | NM_010636      | 512.9  | 214.1    | 2.4         |  |
| 10416800                                              | <i>Lmo7</i>     | NM_201529      | 734.4  | 307.4    | 2.4         |  |
| 10481304                                              | <i>Gfi1b</i>    | NM_008114      | 593.1  | 250.9    | 2.4         |  |
| 10545921                                              | <i>Mxd1</i>     | NM_010751      | 2558.9 | 1098.0   | 2.3         |  |
| 10349295                                              | <i>Tcfcp2l1</i> | NM_023755      | 805.7  | 358.5    | 2.2         |  |
| 10536483                                              | <i>Tes</i>      | NM_207176      | 1879.6 | 849.4    | 2.2         |  |
| 10532907                                              | <i>Hnf1a</i>    | NM_009327      | 360.7  | 163.0    | 2.2         |  |
| 10363735                                              | <i>Egr2</i>     | NM_010118      | 3495.3 | 1602.5   | 2.2         |  |
| 10565292                                              | <i>Arnt2</i>    | NM_007488      | 599.0  | 285.8    | 2.1         |  |
| 10361828                                              | <i>Cited2</i>   | NM_010828      | 5755.6 | 2765.0   | 2.1         |  |
| 10393266                                              | <i>Foxj1</i>    | NM_008240      | 234.2  | 114.5    | 2.0         |  |
| 10404402                                              | <i>Foxq1</i>    | NM_008239      | 677.0  | 342.6    | 2.0         |  |
| 10345016                                              | <i>Tcfap2b</i>  | NM_009334      | 105.6  | 55.3     | 1.9         |  |

**Suppl. Table 1**

| <b>Top50 transcription factors repressed by HDAC3 in mTECs</b> |                |                |        |          |       |       |
|----------------------------------------------------------------|----------------|----------------|--------|----------|-------|-------|
| Probe Set ID                                                   | Gene Symbol    | mRNA Accession | WT     | HDAC3cKO | WT/KO | ratio |
| 10505911                                                       | <i>Dmrta1</i>  | NM_175647      | 342.0  | 3388.1   |       | 0.10  |
| 10423971                                                       | <i>Pkhd11</i>  | NM_138674      | 100.1  | 925.0    |       | 0.11  |
| 10608107                                                       | <i>Uty</i>     | NM_009484      | 93.2   | 614.3    |       | 0.15  |
| 10394534                                                       | <i>Osr1</i>    | NM_011859      | 220.5  | 1413.8   |       | 0.16  |
| 10607972                                                       | <i>Kdm5d</i>   | NM_011419      | 95.6   | 477.6    |       | 0.20  |
| 10474295                                                       | <i>Wt1</i>     | NM_144783      | 145.4  | 718.5    |       | 0.20  |
| 10514049                                                       | <i>Nfib</i>    | NM_001113209   | 227.4  | 989.3    |       | 0.23  |
| 10497203                                                       | <b>Hey1</b>    | NM_010423      | 1161.3 | 5043.3   |       | 0.23  |
| 10368556                                                       | <b>Hey2</b>    | NM_013904      | 403.9  | 1713.6   |       | 0.24  |
| 10421950                                                       | <i>Dach1</i>   | NM_007826      | 179.4  | 700.8    |       | 0.26  |
| 10453857                                                       | <i>Gata6</i>   | NM_010258      | 299.5  | 1091.1   |       | 0.27  |
| 10538811                                                       | <i>Prdm5</i>   | NM_027547      | 220.3  | 791.9    |       | 0.28  |
| 10544751                                                       | <i>Hoxa2</i>   | NM_010451      | 240.7  | 864.2    |       | 0.28  |
| 10601519                                                       | <i>Klhl4</i>   | NM_172781      | 64.8   | 213.7    |       | 0.30  |
| 10380660                                                       | <i>Hoxb2</i>   | NM_134032      | 162.3  | 513.7    |       | 0.32  |
| 10481056                                                       | <b>Notch1</b>  | NM_008714      | 2659.7 | 8390.4   |       | 0.32  |
| 10363901                                                       | <i>Etv5</i>    | NM_023794      | 188.3  | 577.8    |       | 0.33  |
| 10381006                                                       | <i>Thra</i>    | NM_178060      | 677.3  | 2050.6   |       | 0.33  |
| 10376060                                                       | <i>Irf1</i>    | NM_008390      | 2390.3 | 7034.3   |       | 0.34  |
| 10509218                                                       | <i>Zfp46</i>   | NM_009557      | 288.3  | 834.9    |       | 0.35  |
| 10438626                                                       | <i>Etv5</i>    | NM_023794      | 102.7  | 292.4    |       | 0.35  |
| 10476939                                                       | <i>Gm4979</i>  | NM_001142411   | 532.8  | 1493.1   |       | 0.36  |
| 10600093                                                       | <i>Zfp185</i>  | NM_009549      | 146.2  | 408.6    |       | 0.36  |
| 10544756                                                       | <i>Hoxa3</i>   | NM_010452      | 91.8   | 255.2    |       | 0.36  |
| 10481857                                                       | <i>Pbx3</i>    | NM_016768      | 709.1  | 1959.4   |       | 0.36  |
| 10374727                                                       | <i>Bcl11a</i>  | NM_016707      | 834.6  | 2223.0   |       | 0.38  |
| 10390328                                                       | <i>Tbx21</i>   | NM_019507      | 278.8  | 728.5    |       | 0.38  |
| 10488459                                                       | <i>Zfp442</i>  | NM_001177550   | 70.5   | 182.7    |       | 0.39  |
| 10511835                                                       | <i>Fhl5</i>    | NM_021318      | 56.6   | 146.4    |       | 0.39  |
| 10401238                                                       | <i>Zfp36l1</i> | NM_007564      | 2137.8 | 5505.4   |       | 0.39  |
| 10497646                                                       | <i>Phc3</i>    | NM_001165954   | 384.8  | 987.2    |       | 0.39  |
| 10509163                                                       | <i>Id3</i>     | NM_008321      | 1055.4 | 2699.6   |       | 0.39  |
| 10369252                                                       | <i>Sep10</i>   | NM_001024911   | 381.1  | 953.0    |       | 0.40  |
| 10366293                                                       | <i>Csrp2</i>   | NM_007792      | 1103.1 | 2721.4   |       | 0.41  |
| 10375864                                                       | <i>Agxt2l2</i> | NM_028398      | 406.5  | 992.9    |       | 0.41  |
| 10476874                                                       | <i>Pax1</i>    | NM_008780      | 1550.8 | 3755.1   |       | 0.41  |
| 10386394                                                       | <i>Zfp867</i>  | NM_178417      | 86.1   | 207.9    |       | 0.41  |
| 10459905                                                       | <i>Setbp1</i>  | NM_053099      | 716.4  | 1726.3   |       | 0.42  |
| 10536505                                                       | <i>Met</i>     | NM_008591      | 266.5  | 641.5    |       | 0.42  |
| 10395409                                                       | <i>Meox2</i>   | NM_008584      | 544.6  | 1310.2   |       | 0.42  |
| 10529875                                                       | <i>Ldb2</i>    | NM_001077398   | 584.1  | 1384.3   |       | 0.42  |
| 10557211                                                       | <i>Rbbp6</i>   | NM_011247      | 150.0  | 355.2    |       | 0.42  |
| 10540523                                                       | <i>Lmcd1</i>   | NM_144799      | 318.3  | 751.3    |       | 0.42  |
| 10565204                                                       | <i>Bnc1</i>    | NM_007562      | 227.4  | 535.6    |       | 0.42  |
| 10506050                                                       | <i>Nfia</i>    | NM_001122952   | 761.4  | 1787.7   |       | 0.43  |
| 10441270                                                       | <i>Ripk4</i>   | NM_023663      | 410.2  | 938.6    |       | 0.44  |
| 10386219                                                       | <i>Zfp39</i>   | NM_011758      | 236.8  | 541.8    |       | 0.44  |
| 10445071                                                       | <i>Zfp57</i>   | NM_001013745   | 250.5  | 569.5    |       | 0.44  |
| 10434806                                                       | <i>Lpp</i>     | NM_178665      | 2612.7 | 5811.1   |       | 0.45  |
| 10462195                                                       | <i>Kank1</i>   | NM_181404      | 302.3  | 671.0    |       | 0.45  |

## Supplemental Experimental Information

### Extended Materials and Methods:

#### **Antibodies and reagents:**

Antibodies were purchased from the indicated manufacturers/providers:

#### eBioscience:

Fixable Viability Dye eFluor® 506

#### Vector laboratories:

Biotinylated UEA1

#### Biolegend:

APC, APC-Cy7 anti-mouse EpCAM (CD326)

FITC, PerCP-Cy5.5 anti-mouse CD45

Streptavidin conjugated PE-Cy7

PE, Biotinylated anti-mouse Ly51

Pacific-Blue, APC anti-mouse I-A/I-E

Pacific-Blue anti-mouse CD80

APC anti-mouse CD8 $\alpha$

Pacific-Blue anti-mouse CD4

PE anti-mouse CD25

Alexa-Fluor 488 anti-mouse Foxp3

PE anti-rat IgG2c

#### Jackson:

Goat anti-Rabbit AF488

Goat anti-Rat Cy3

Streptavidin conjugated Cy2

#### Covance:

Rabbit polyclonal antibody anti-Keratin 5 (PRB-160P)

#### MBL:

Rabbit anti-Mouse  $\beta$ 5t

#### Millipore:

Rat anti-Aire mAb, clone 5H12

Recombinant mouse RANKL was produced by the Structural Proteomics Unit at the Weizmann Institute.

### **Cell preparation, flow cytometry and sorting:**

**A) Isolation of thymic stromal cells:** Thymi were surgically removed from mice of different ages (2 – 16 weeks) and placed into cold 1X PBS supplemented with 2% Fetal Bovine Serum (FBS, Invitrogen). Thymi were trimmed of fat and connective tissues and minced into small pieces. Thymi were then disintegrated by enzymatic digestion using 0.5mg/ml Collagenase D (Roche #1088858), 1mg/ml Collagenase-Dispase cocktail (Roche #269638), 2% FBS and DNase in RPMI until complete digestion.

The single cell suspension was then filtered through 52micron mesh filter and resolved on a Percoll gradient. To this end, single cell suspension was washed and re-suspended in 1.115 g/ml isotonic Percoll (Sigma), topped by one layer of isotonic 1.065 g/ml Percoll and one layer of 1X PBS. Percoll gradient was centrifuged at 2700rpm at 4°C with no break, for 30 minutes. Stromal cells, found between the 1X PBS layer and the 1.065 g/ml Percoll layer, were collected and washed with MACS buffer (2% FBS with 5mM EDTA pH 8.0 in 1X PBS) followed by centrifugation at 1300rpm for 4 minutes at 4°C. Cells were then stained with the specific antibodies.

**B) Isolation of thymocytes:** Thymi were mechanically digested by squashing through a 40micron cell strainer. Thymocytes were collected into MACS buffer, filtered again through 52micron mesh filter, washed with MACS buffer and subjected to staining with the appropriate antibodies.

**C) Isolation of splenocytes:** Spleens were surgically removed from 4- to 9-week-old mice and placed into cold 2% FBS in 1X PBS. Spleens were then trimmed of fat and connective tissues and then mechanically disintegrated through 40µm mesh filter. Cells were collected and washed with MACS buffer. In order to remove red blood cells, pellets were re-suspended in 1X ACK Lysing buffer (15mM Ammonium-Chloride, 1mM Potassium bicarbonate, 10µM EDTA in DDW, pH 7.3) and incubated for 4 minutes in room temperature. After incubation, cell suspension was washed with MACS buffer, filtered through 52 micron mesh filter, washed again and then stained with the specific antibodies.

**Immunostaining of cell suspensions:** All cells were stained in 100µl MACS buffer and incubated with the specific fluorophore-labeled antibodies for 20-60 minutes at 4°C. Antibodies and dilutions are indicated under antibodies section.

For intracellular staining of Aire or Foxp3, cells labeled for membrane antigens were washed



and then fixed in Fixation/Permeabilization solution (eBioScience/ Biolegend, respectively), followed by Aire/anti-rat IgG2c-PE staining or Foxp3-Alexa 488 antibody staining.

***Flow cytometry analysis, sorting and data processing:***

Following staining, cells were washed, re-suspended in MACS buffer, filtered and analyzed either on the BD FACS Canto II analyzer or sorted in BD FACS Aria III cell sorter. All compensations were performed on cells labeled with single colors. Data analysis was done using FlowJo software.

**Real-Time PCR analysis:**

RNA was extracted from sorted cells using Trizol reagent and used for cDNA synthesis (Life Technologies) according to manufacturer’s instructions and the entire amount of purified total RNA was then used for cDNA synthesis using the High-Capacity cDNA kit (Applied Biosystems) and random primers. The subsequent qPCR analysis was performed using the Fast SYBR Green Master Mix (Life technologies) or TaqMan Fast advanced master mix (Life technologies) for testing deletion efficacy. Differential expression was calculated according to the  $\Delta\Delta CT$  method and the obtained data were then statistically evaluated (ANOVA test, P-value < 0.05) using StatView software (SAS Institute Inc.).

***List of specific TaqMan assays for deletion efficacy:***

All assays were purchased from ThermoScientific

| Mouse strain        | Assay ID      |
|---------------------|---------------|
| <i>Hdac1</i> -flox  | Mm01610894_g1 |
| <i>Hdac2</i> -flox  | Mm01193629_m1 |
| <i>Hdac3</i> -flox  | Mm01258398_g1 |
| <i>N-CoR1</i> -flox | Mm01333098_m1 |
| <i>SMRT</i> -flox   | Mm01198135_m1 |

***List of specific primers for qPCR analysis:***

| Gene  | Forward                     | Reverse                |
|-------|-----------------------------|------------------------|
| Rpl32 | TTAAGCGAAACTGGCGGAAAC       | TTGTTGCTCCCATAACCGATG  |
| HPRT  | TGAAGAGCTACTGTAATGATCAGTCAA | AGCAAGCTTGCAACCTTAACCA |
| Aire  | GTACAGCCGCCTGCATAGC         | CCCTTTCCGGGACTGGTT     |
| Ins2  | GACCCACAAGTGGCACAA          | ATCTACAATGCCACGCTTCTG  |
| Pcp4  | TCTGAGCTGTTCTGTGGGACC       | TCCGGCACTTTGTCTCTCACT  |

|        |                            |                             |
|--------|----------------------------|-----------------------------|
| Mup4   | CTGACCCTAGTCTGTATTCATGCA   | CCATTCCCCATTAATCTTTTCTACATT |
| Dio1   | TGCTACAAGGGTAAAGCTGGCCC    | AGGCACGTGTCTAGGTGGAGTG      |
| Zp2    | GGGCTCTCCAGCCTGATCTACTTC   | ATGCAGGGCAAGTCACAGAGC       |
| Pld1   | AGTGCAGTTGCTCCGATCTGC      | TGGATGTAGGCAGCGTGGATGG      |
| RANK   | AGAGGCATTATGAGCATCTCG      | GGAGTGCACCTTAGAGGACAGGT     |
| IkBα   | ACGAGCAAATGGTGAAGGAG       | ATGATTGCCAAGTGCAGGA         |
| RelB   | CCGGCACAGCTTTAACAACC       | TCTTCAGGGAGCCAGCATTG        |
| Fezf2  | ACTCGGCCTGACAGCTGAACG      | TGAGCATTGAACACCTTGCCGCAC    |
| Ascl1  | TGGACTTTGGAAGCAGGATGG      | GAAGGTGCCCCTGTAGGTTG        |
| Pou2f3 | CCATGCCTGGAACAGTAACG       | CCTGAACCAGGAGACGAAGG        |
| Hey1   | TGAGAAGCAGGGATCTGCTAAG     | GCATTCCCGAAACCCCAAAC        |
| Hey2   | ACAGGGGGTAAAGGCTACTTTG     | AGATGAGAGACAAGGCGCAC        |
| Notch1 | ACAGTGCAACCCCCTGTATG       | AGTTGTTCCGTAGCTGGTCG        |
| Notch2 | GCCACTGCATGTTGCCTTAC       | CATCGTTTACCTTGCCAGCC        |
| Notch3 | TTCCCCGTGTCGTAATGGTG       | TCGAAGCCAGGAAGGCAAG         |
| Pax1   | CGGACGTTTATGGAGCAAAC       | TCCATCTTGGGGGAGTAGG         |
| Prss16 | TGGGACGTCAGAAAATCTCCC      | TGATGGGACTGTCAAAGGGC        |
| Sp1B   | ATCTCAGGCAGGTGCACGCAAG     | GCGAGCCAACAACCTCCTTGTGC     |
| CD40   | GAGTCAGACTAATGTCATCTGTGGTT | GGTTTCTTGACCACCTTTTTGA      |

### **Pathological evaluation and mice irradiation:**

Histopathology, including analysis and scoring of immune infiltrates in various peripheral tissues, was performed under supervision of a certified animal pathologist. Briefly, scoring was assessed according to size and frequency of immune infiltrates, with scanning of 3 slices from each animal. Score 0 marked animals in which no infiltrates were found, while score 2.5 marked animals in which many large infiltrates were found (Suppl. Fig. 2B). Final score was calculated as the average of scoring performed by two independent people.

*Hdac3*-cKO and WT mice (5 to 6-week-old) were sub-lethally irradiated (~300 rad) in order to cause transient lymphopenia, as a means to aggravate autoimmunity. Mice were analyzed three months later for the presence of immune infiltrates in peripheral tissues, as described above.

### **Statistical analysis:**

Two- or three-way analysis of variance (ANOVA) with a pre-determined significance level of 0.05 was conducted. Provided significant group differences, Fisher's protected least significant differences (Fisher's PLSD) contrasts were performed to compare specific pairs of

groups. Student's t-test was used for the comparison of only two groups to determine statistically significant differences with a pre-determined significance level of 0.05. The Mann-Whitney U-test for unpaired samples was used to determine the statistical significance of autoimmune infiltrates with a pre-determined significance level of 0.05. All statistical analyses were conducted using StatView software (SAS Institute, San Francisco, CA).
